# Supplementary material for: Modified MXene: promising electrode materials for constructing Ohmic contacts with MoS2for electronic device applications
Source: Royal Society of Chemistry journal article supplement (doi:10.1039/c8cp02300j), 2018-01-01
Supplement: c8cp02300j1.pdf [file c8cp02300j1.pdf]

## Supporting information for

# Modified MXene : Promising electrode materials for constructing Ohmic contact with MoS<sub>2</sub> for electronic device application

Pei Zhao,<sup>†</sup> Hao Jin,<sup>‡</sup> Xingshuai Lv,<sup>†</sup> Baibiao Huang,<sup>†</sup> Yandong Ma<sup>†,\*</sup> and Ying Dai<sup>†,\*</sup>

<sup>†</sup>School of Physics, State Key Laboratory of Crystal Materials, Shandong University, Shandan Str. 27, 250100 Jinan, People's Republic of China

<sup>‡</sup>College of Physics and Energy, Shenzhen University, Shenzhen 518060, People's Republic of China.

\*Corresponding author: [yandong.ma@sdu.edu.cn](mailto:yandong.ma@sdu.edu.cn) (Y.M.); [daiy60@sina.com](mailto:daiy60@sina.com) (Y.D.)

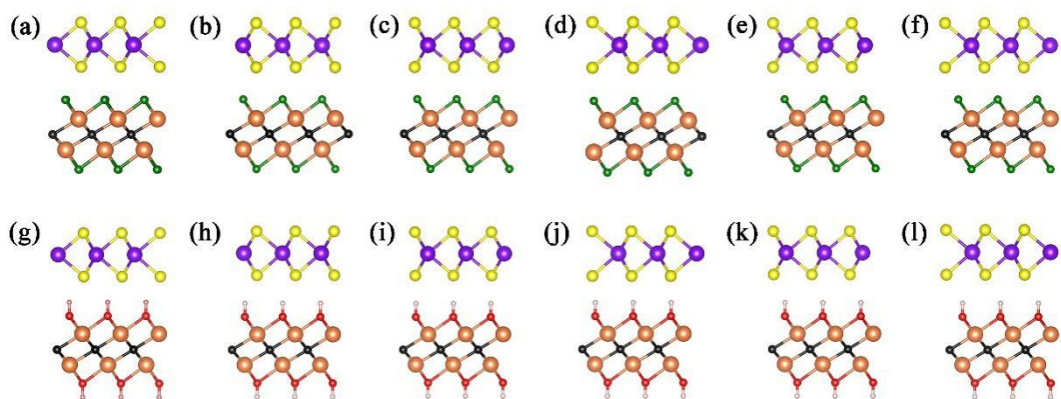

**Figure S1.** Side views of six different stacking patterns of  $\text{MoS}_2/\text{Ta}_2\text{CY}_2$  ( $\text{Y}=\text{F}, \text{OH}$ ) structures. The yellow, purples, green, white, red, orange and black balls are S, Mo, F, H, O, Ta and C atoms respectively.

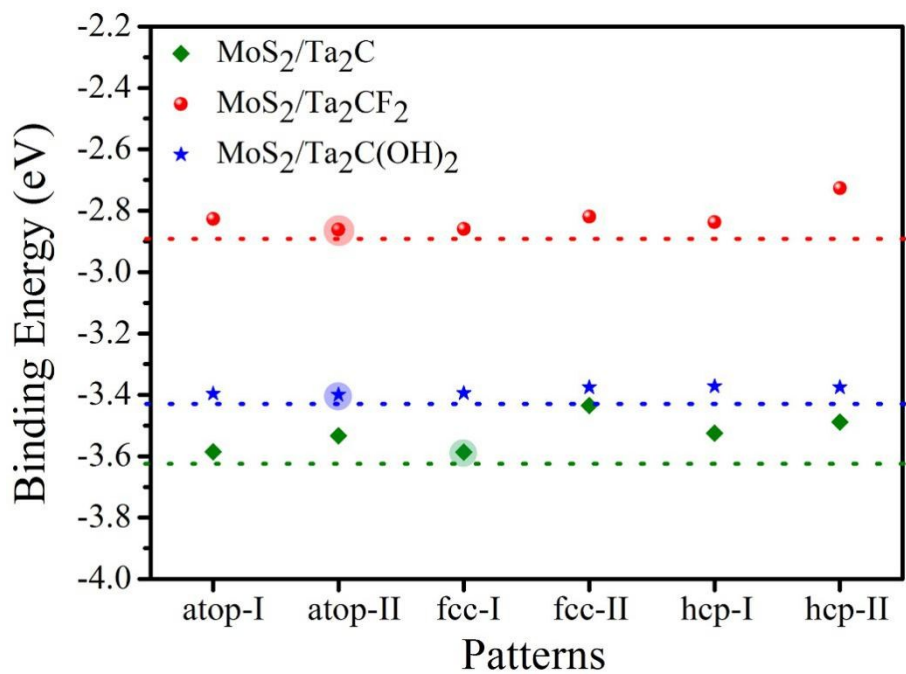

**Figure S2.** The scatter diagram of binding energy for  $\text{MoS}_2/\text{Ta}_2\text{C}$ ,  $\text{MoS}_2/\text{Ta}_2\text{CF}_2$  and  $\text{MoS}_2/\text{Ta}_2\text{C}(\text{OH})_2$  systems respectively.

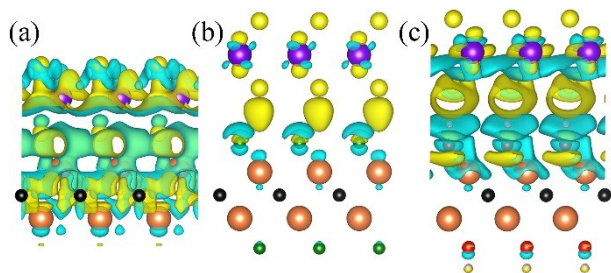

**Figure S3.** The charge difference between  $\text{MoS}_2$  and (a)  $\text{Ta}_2\text{C}$ , (b)  $\text{Ta}_2\text{CF}_2$ , (c)  $\text{Ta}_2\text{C}(\text{OH})_2$ . The yellow and green region represent electron accumulation and depletion, respectively.

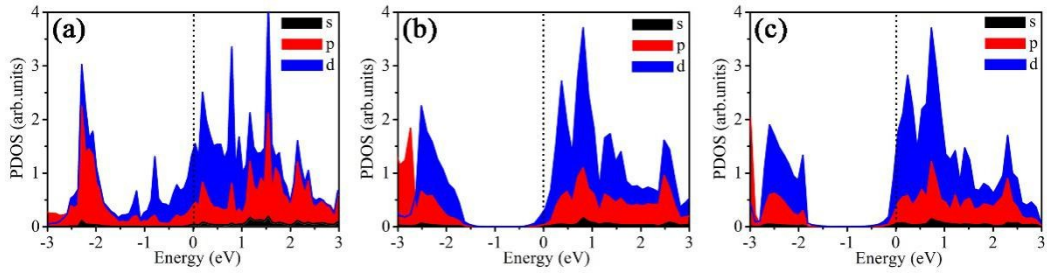

**Figure S4.** Partial density of states (PDOS) of pure monolayer MoS<sub>2</sub> on the Ta<sub>2</sub>C, Ta<sub>2</sub>CF<sub>2</sub> and Ta<sub>2</sub>C(OH)<sub>2</sub>. The fermi level is set at zero energy.

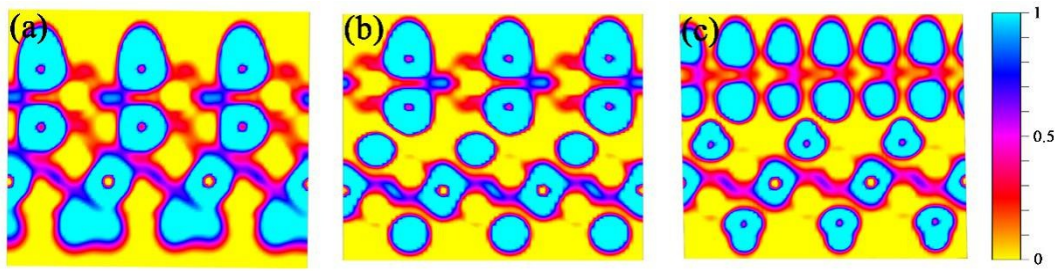

**Figure S5.** The electron localization function (ELF) of (a) MoS<sub>2</sub>/Ta<sub>2</sub>C, (b) MoS<sub>2</sub>/Ta<sub>2</sub>CF<sub>2</sub> and (c) MoS<sub>2</sub>/Ta<sub>2</sub>C(OH)<sub>2</sub> systems.
